# Supplementary material for: Development of Gluten-Free Bread Based on Maize and Buckwheat and Enriched with Aromatic Herbs and Spices
Source: MDPI journal article supplement (doi:10.3390/app14083348), 2024-04-16
Supplement: s1 [file s1]

## Supplementary material

# Development of Gluten-Free Bread Based on Maize and Buckwheat and Enriched with Aromatic Herbs and Spices

Laura Ruiz-Aceituno <sup>1</sup>, Natalia Casado <sup>2</sup>, Emma Arriero-Romo <sup>2</sup>, Sonia Morante-Zarcero <sup>2</sup>, Almudena Lázaro <sup>1,\*</sup> and Isabel Sierra <sup>2,3,\*</sup>

<sup>1</sup> Centro de Innovación Gastronómica de la Comunidad de Madrid, Instituto Madrileño de Investigación y Desarrollo Rural, Agrario y Alimentario (IMIDRA), Calle Goya 5-7, 28001 Madrid, Spain; laura.ruiz@madrid.org

<sup>2</sup> Departamento de Tecnología Química y Ambiental, Escuela Superior de Ciencias Experimentales y Tecnología (ESCET), Universidad Rey Juan Carlos, C/Tulipán s/n, 28933 Móstoles, Spain; natalia.casado@urjc.es (N.C.); e.arriero.2018@alumnos.urjc.es (E.A.-R.); sonia.morante@urjc.es (S.M.-Z.)

<sup>3</sup> Instituto de Investigación de Tecnologías para la Sostenibilidad, Universidad Rey Juan Carlos, C/Tulipán s/n, 28933 Móstoles, Spain

\* Correspondence: almudena.lazaro@madrid.org (A.L.); isabel.sierra@urjc.es (I.S.)

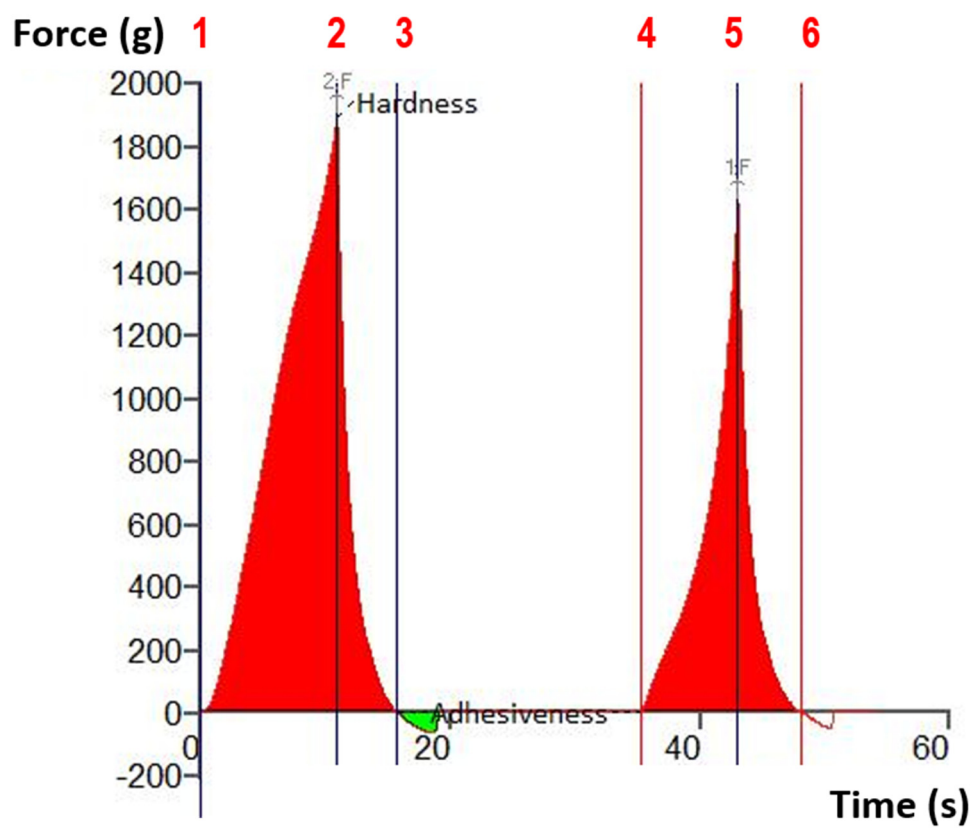

**Figure S1.** Force-time curve obtained from the TPA test for control gluten-free bread

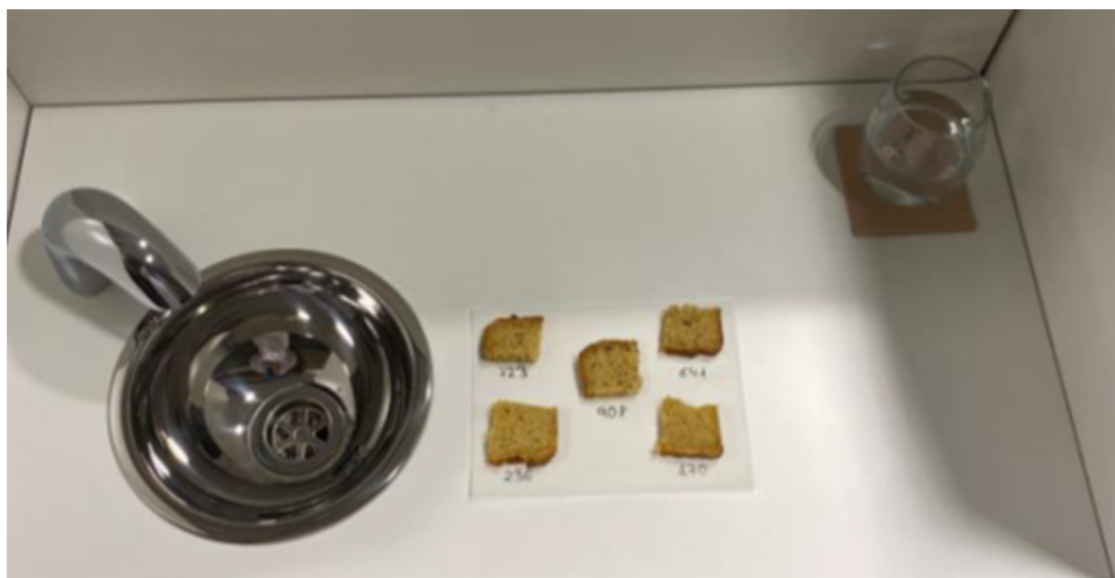

**Figure S2.** Presentation of the codified gluten-free bread samples for sensory analysis.

**Table S1.** Specific volume and textural parameters values obtained from the experimental design.

| Experiment | Specific volume<br>(cm <sup>3</sup> /g) | Hardness (g)             | Adhesiveness<br>(g.sec)  | Springiness**               | Cohesiveness**           | Chewiness**                | Resilience**                |
|------------|-----------------------------------------|--------------------------|--------------------------|-----------------------------|--------------------------|----------------------------|-----------------------------|
| 1          | 1.3 <sub>c</sub> ± 0.1*                 | 7839 <sub>a</sub> ± 1247 | -13 <sub>a</sub> ± 8     | 0.62 <sub>cd</sub> ± 0.04   | 0.45 <sub>a</sub> ± 0.06 | 2186 <sub>ab</sub> ± 438   | 0.20 <sub>abcd</sub> ± 0.03 |
| 2          | 1.8 <sub>a</sub> ± 0.4                  | 1835 <sub>e</sub> ± 246  | -316 <sub>bc</sub> ± 178 | 0.57 <sub>d</sub> ± 0.04    | 0.40 <sub>a</sub> ± 0.02 | 422 <sub>d</sub> ± 65      | 0.15 <sub>d</sub> ± 0.01    |
| 3          | 1.57 <sub>abc</sub> ± 0.02              | 3701 <sub>cd</sub> ± 117 | -129 <sub>ab</sub> ± 32  | 0.67 <sub>abcd</sub> ± 0.08 | 0.50 <sub>a</sub> ± 0.04 | 1208 <sub>bcd</sub> ± 51   | 0.19 <sub>abcd</sub> ± 0.03 |
| 4          | 1.62 <sub>abc</sub> ± 0.09              | 2740 <sub>de</sub> ± 72  | -54 <sub>a</sub> ± 20    | 0.70 <sub>abcd</sub> ± 0.02 | 0.43 <sub>a</sub> ± 0.03 | 819 <sub>cd</sub> ± 64     | 0.18 <sub>cd</sub> ± 0.02   |
| 5          | 1.37 <sub>bc</sub> ± 0.07               | 8570 <sub>a</sub> ± 803  | -16 <sub>a</sub> ± 38    | 0.64 <sub>bcd</sub> ± 0.04  | 0.40 <sub>a</sub> ± 0.01 | 2215 <sub>ab</sub> ± 257   | 0.17 <sub>cd</sub> ± 0.01   |
| 6          | 1.38 <sub>bc</sub> ± 0.02               | 8051 <sub>a</sub> ± 303  | -25 <sub>a</sub> ± 15    | 0.61 <sub>cd</sub> ± 0.05   | 0.42 <sub>a</sub> ± 0.02 | 2074 <sub>ab</sub> ± 279   | 0.17 <sub>cd</sub> ± 0.01   |
| 7          | 1.58 <sub>abc</sub> ± 0.08              | 3758 <sub>cd</sub> ± 329 | 21 <sub>a</sub> ± 9      | 0.83 <sub>a</sub> ± 0.04    | 0.54 <sub>a</sub> ± 0.06 | 1674 <sub>abc</sub> ± 181  | 0.26 <sub>a</sub> ± 0.04    |
| 8          | 1.48 <sub>abc</sub> ± 0.08              | 4423 <sub>bc</sub> ± 593 | -71 <sub>a</sub> ± 110   | 0.7 <sub>abcd</sub> ± 0.1   | 0.42 <sub>a</sub> ± 0.04 | 1220 <sub>bcd</sub> ± 202  | 0.14 <sub>d</sub> ± 0.01    |
| 9          | 1.23 <sub>c</sub> ± 0.01                | 4805 <sub>bc</sub> ± 111 | -5 <sub>a</sub> ± 2      | 0.70 <sub>abcd</sub> ± 0.02 | 0.43 <sub>a</sub> ± 0.01 | 1426 <sub>abcd</sub> ± 121 | 0.18 <sub>bcd</sub> ± 0.01  |
| 10         | 1.34 <sub>bc</sub> ± 0.07               | 5240 <sub>b</sub> ± 303  | -361 <sub>c</sub> ± 286  | 0.54 <sub>d</sub> ± 0.04    | 0.45 <sub>a</sub> ± 0.02 | 1283 <sub>abcd</sub> ± 146 | 0.18 <sub>cd</sub> ± 0.02   |
| 11         | 1.53 <sub>abc</sub> ± 0.06              | 4122 <sub>bcd</sub> ± 57 | -15 <sub>a</sub> ± 5     | 0.68 <sub>abcd</sub> ± 0.06 | 0.51 <sub>a</sub> ± 0.05 | 1419 <sub>abcd</sub> ± 90  | 0.24 <sub>abc</sub> ± 0.03  |
| 12         | 1.7 <sub>ab</sub> ± 0.1                 | 3542 <sub>cd</sub> ± 80  | -61 <sub>a</sub> ± 43    | 0.8 <sub>ab</sub> ± 0.8     | 0.5 <sub>a</sub> ± 0.1   | 2309 <sub>a</sub> ± 1092   | 0.26 <sub>ab</sub> ± 0.06   |
| 13         | 1.62 <sub>abc</sub> ± 0.07              | 1979 <sub>e</sub> ± 159  | -106 <sub>a</sub> ± 57   | 0.75 <sub>abc</sub> ± 0.05  | 0.48 <sub>a</sub> ± 0.03 | 721 <sub>cd</sub> ± 112    | 0.19 <sub>abcd</sub> ± 0.01 |

\* Results are the means ± standard deviation. Values in the same column with different superscript letters are significantly different ( $p \leq 0.05$ ) (post hoc Tukey test)

\*\*Dimensionless

**Table S2.** Color parameters values obtained from the experimental design.

| Experiment | L*                          | a*                         | b*                          |
|------------|-----------------------------|----------------------------|-----------------------------|
| 1          | 63 ± 1 <sup>ab*</sup>       | 3.0 ± 0.2 <sup>bcde</sup>  | 34 ± 1 <sup>bcd</sup>       |
| 2          | 62 ± 1 <sup>ab</sup>        | 1.8 ± 0.3 <sup>e</sup>     | 36.02 ± 0.05 <sup>bc</sup>  |
| 3          | 57 ± 1 <sup>de</sup>        | 3.7 ± 0.6 <sup>abc</sup>   | 33.60 ± 0.05 <sup>bcd</sup> |
| 4          | 65 ± 1 <sup>a</sup>         | 2.0 ± 0.6 <sup>de</sup>    | 43.0 ± 0.3 <sup>a</sup>     |
| 5          | 62 ± 1 <sup>abc</sup>       | 4.2 ± 0.2 <sup>a</sup>     | 45.6 ± 0.9 <sup>a</sup>     |
| 6          | 59.4 ± 0.3 <sup>abcde</sup> | 3.3 ± 0.1 <sup>abc</sup>   | 30.50 ± 0.06 <sup>d</sup>   |
| 7          | 59 ± 2 <sup>bcde</sup>      | 3 ± 1 <sup>cde</sup>       | 31 ± 4 <sup>d</sup>         |
| 8          | 55 ± 4 <sup>e</sup>         | 3.1 ± 0.3 <sup>abcd</sup>  | 30.2 ± 0.7 <sup>d</sup>     |
| 9          | 61.3 ± 0.2 <sup>abcd</sup>  | 2.49 ± 0.09 <sup>cde</sup> | 37.4 ± 0.4 <sup>b</sup>     |
| 10         | 56 ± 3 <sup>de</sup>        | 3.96 ± 0.06 <sup>ab</sup>  | 37.8 ± 2 <sup>b</sup>       |
| 11         | 60 ± 1 <sup>abcde</sup>     | 3.5 ± 0.3 <sup>abc</sup>   | 44.0 ± 0.8 <sup>a</sup>     |
| 12         | 57.9 ± 0.3 <sup>cde</sup>   | 2.5 ± 0.3 <sup>cde</sup>   | 32.2 ± 0.7 <sup>cd</sup>    |
| 13         | 58.6 ± 0.9 <sup>bcde</sup>  | 2.8 ± 0.5 <sup>bcde</sup>  | 31 ± 2 <sup>d</sup>         |

\* Results are the means ± standard deviation. Values in the same column with different superscript letters are significantly different ( $p \leq 0.05$ ) (post hoc Tukey test)
